# Supplementary material
Source: PubMed Central journal article supplement (PMC4598287)
Supplement: NIHMS710430-supplement-Supp-Table_S1-Figs-and-Exp_Proc.pdf [file NIHMS710430-supplement-Supp-Table_S1-Figs-and-Exp_Proc.pdf]

## Supplemental information

1. **Table S1.** List of genes and human orthologs. Refers to Figure 1.
2. **Table S2** (Microsoft Excel file). **Co-regulation of lipogenic and immune function genes with depletion of SAMe.** Refers to **Figure 1**
3. **Table S3** (Microsoft Excel files), **Choline rescues gene expression after *sams-1(RNAi)*.** Refers to **Figure 3**
4. **Figure S1. Choline rescues upregulation of lipogenic or innate immune genes in *sams-1(lof)* animals on *E. coli*.** Refers to **Figure 3.**
5. **Table S4** (Microsoft Excel file). Reduced resistance to *Pseudomonas aeruginosa* in *sams-1(lof)* animals. Statistical data for survival assays. Refers to **Figure 4.**
6. **Figure S2. *sams-1(lof)* mutants fail to accumulate activating histone methylation marks on infection response genes when exposed to *Pseudomonas*.** Refers to **Figure 6.**
7. **Figure S3. *set-16/MLL* is important for expression of infection response genes upon *Pseudomonas* exposure.** Refers to **Figure 7.**

| <b><i>C. elegans</i></b> | <b>Human</b> | <b>Description</b>                        | <b>Function</b>           | <b>Class</b>               |
|--------------------------|--------------|-------------------------------------------|---------------------------|----------------------------|
| <i>act-1</i>             | ACTB         | Beta actin                                | Cytoskeleton              | Control gene               |
| <i>ama-1</i>             | RBP1         | RNA Polymerase 2, large subunit           | Basal transcription       | Control gene               |
| <i>arf-1.1</i>           | ARF1         | ADP-ribosylation factor 1                 | GTPase                    | Intracellular transport    |
| C17H12.6                 |              |                                           | CUB-like domain           | Infection response         |
| C32H11.1                 |              |                                           | CUB domain protein        | Infection response         |
| <i>cyp-13A5</i>          | CYP3A5       | Cytochrome P450 3A5                       | monooxygenases            | Infection response         |
| <i>fat-7</i>             | SCD          | Steroyl CoA desaturase                    | Produces oleic acid       | Fatty acid biosynthesis    |
| <i>fbxa-74</i>           |              | F-box protein                             | Ubiquitin ligase          | Infection response         |
| <i>ges-1</i>             | CES1         | gut esterase                              | Intestine function        | Intestinal control gene    |
| <i>gst-38</i>            | HPGDS        | Hematopoietic prostaglandin D synthase    | Glutathione-S transferase | Infection response         |
| <i>her-1</i>             |              | Male specific secreted protein            | Secreted protein          | Male specific control gene |
| <i>hpo-6</i>             | MUC3A        | Isoform 2 of Mucin-3A                     | Mucin                     | Infection response         |
| <i>irg-1</i>             |              |                                           |                           | Infection response         |
| <i>irg-2</i>             |              |                                           | DUF1768 domain            | Infection response         |
| F49H6.13                 |              |                                           | Claudin-like              | Infection response         |
| F55G11.2                 |              |                                           | CUB domain protein        | Infection response         |
| <i>mul-1</i>             |              |                                           | Mucin                     | Infection response         |
| <i>pcaf-1</i>            | PCAF         | Histone acetyltransferase                 | Transcription             | Control gene               |
| <i>pcyt-1</i>            | PCYT1        | Choline-phosphate cytidyltransferase      | PC production             | Phospholipid synthesis     |
| <i>pgp-5</i>             | ABCB5        | ATP-binding cassette 5 isoform 1          | Efflux pump               | Infection response         |
| <i>pmk-1</i>             | MAPK14       | Mitogen-activated protein kinase 14       | p38 MAP kinase            | Pathogenic stress response |
| <i>pmt-1, pmt-1</i>      |              | phosphocholine methyltransferase          | PC production             | Phospholipid synthesis     |
| <i>rbp-2</i>             | RBP2         | RNA Polymerase 2 subunit                  | Basal transcription       | Control gene               |
| <i>sams-1</i>            | MAT1A/MAT2A  | SAM synthase                              | SAM synthase              | 1-carbon cycle             |
| <i>sbp-1</i>             | SREBF1       | Sterol Response Element binding protein-1 | Transactivator            | Fatty acid                 |

|               |        |                                        |                        |                            |
|---------------|--------|----------------------------------------|------------------------|----------------------------|
|               |        |                                        |                        | biosynthesis               |
| <i>sod-3</i>  | SOD2   | superoxide dismutase                   | oxidative stress       | Oxidative Stress Response  |
| T24C4.4       |        |                                        | claudin-like           | Infection response         |
| <i>taf-1</i>  | TAF1   | TFIID component                        | Basal transcription    | Control gene               |
| <i>tir-1</i>  | SARM1  | Sterile alpha and TIR motif- protein   | adaptor protein        | Pathogenic stress response |
| <i>ugt-16</i> | UGT2B7 | UDP-glucuronosyltransferase 2B7        |                        | Infection response         |
| <i>vhp-1</i>  | DUSP16 | Dual Specificity Phosphatase           | MAP Kinase Phosphatase | Stress response            |
| <i>vit-1</i>  |        | vitellogenin                           | Yolk transport         | Lipid transport            |
| <i>vit-3</i>  |        | vitellogenin                           | Yolk transport         | Lipid transport            |
| Y41C4A.11     | COPB2  | subunit of the coatomer (COPI) complex | COP I transport        | Intracellular transport    |
| Y51B9A.8      |        |                                        | CC domain, ShKT domain | Infection response         |
| Y58A7A.5      |        |                                        |                        | Infection response         |

**Genes mentioned, with human orthologs and functional classifications for use in our study.**

**A**

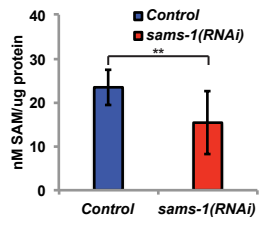

**B**

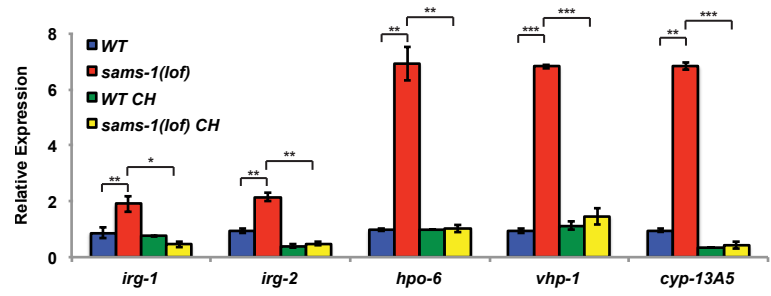

**C**

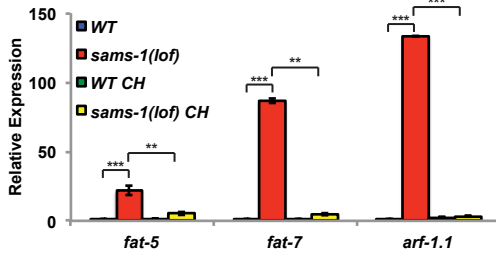

**D**

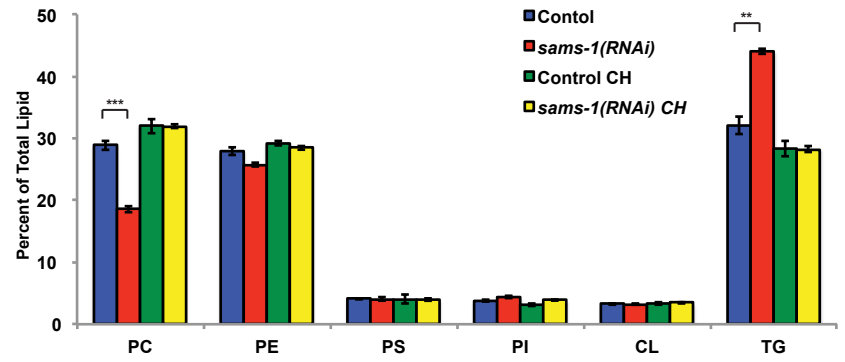

**E**

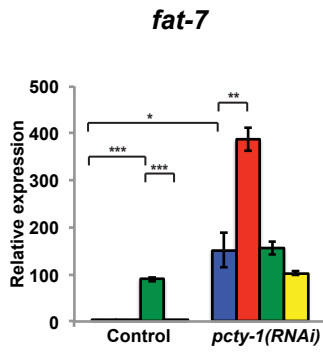

**F**

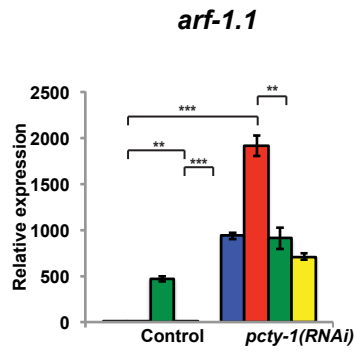

**G**

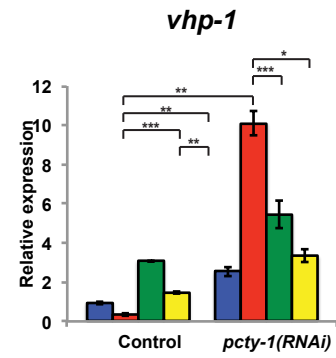

**H**

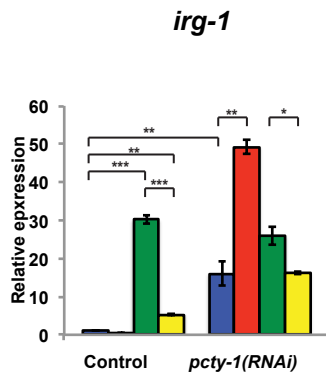

**I**

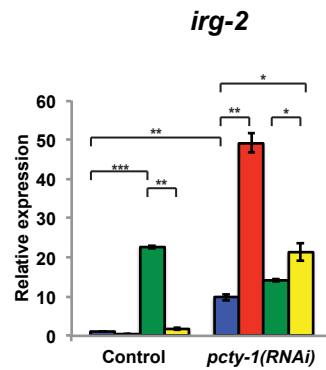

**J**

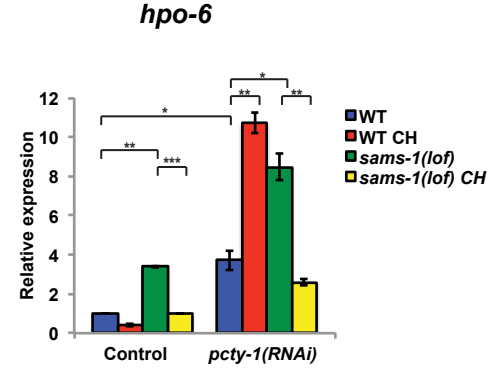

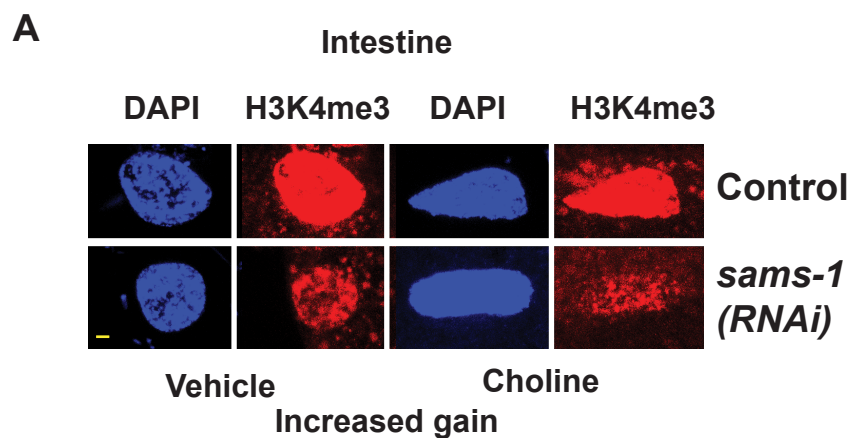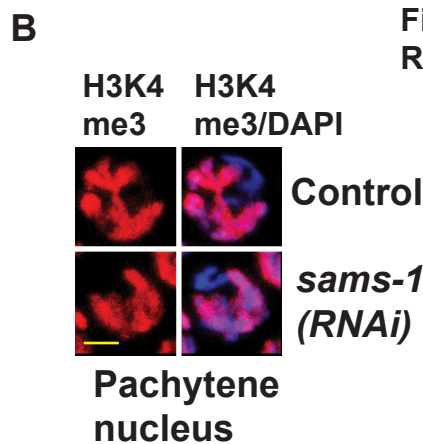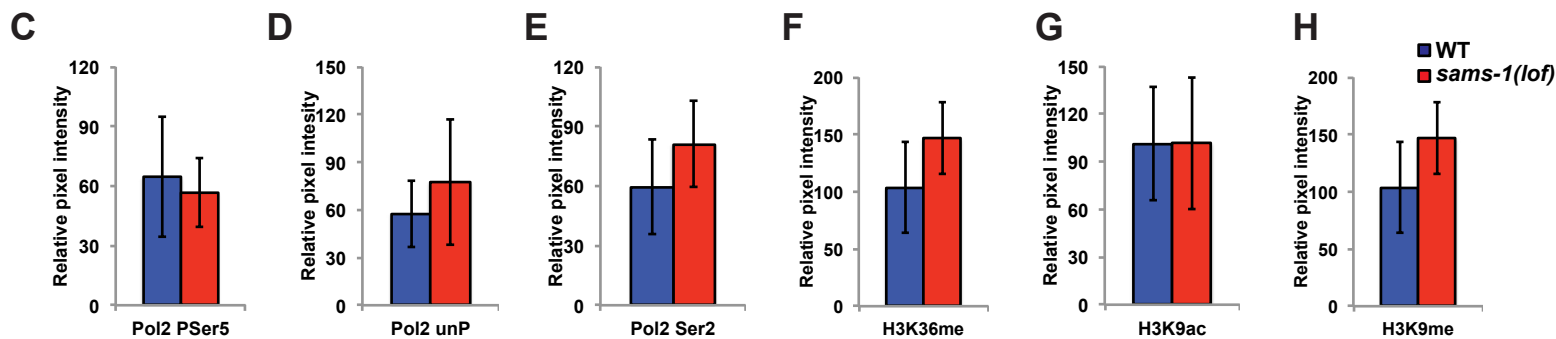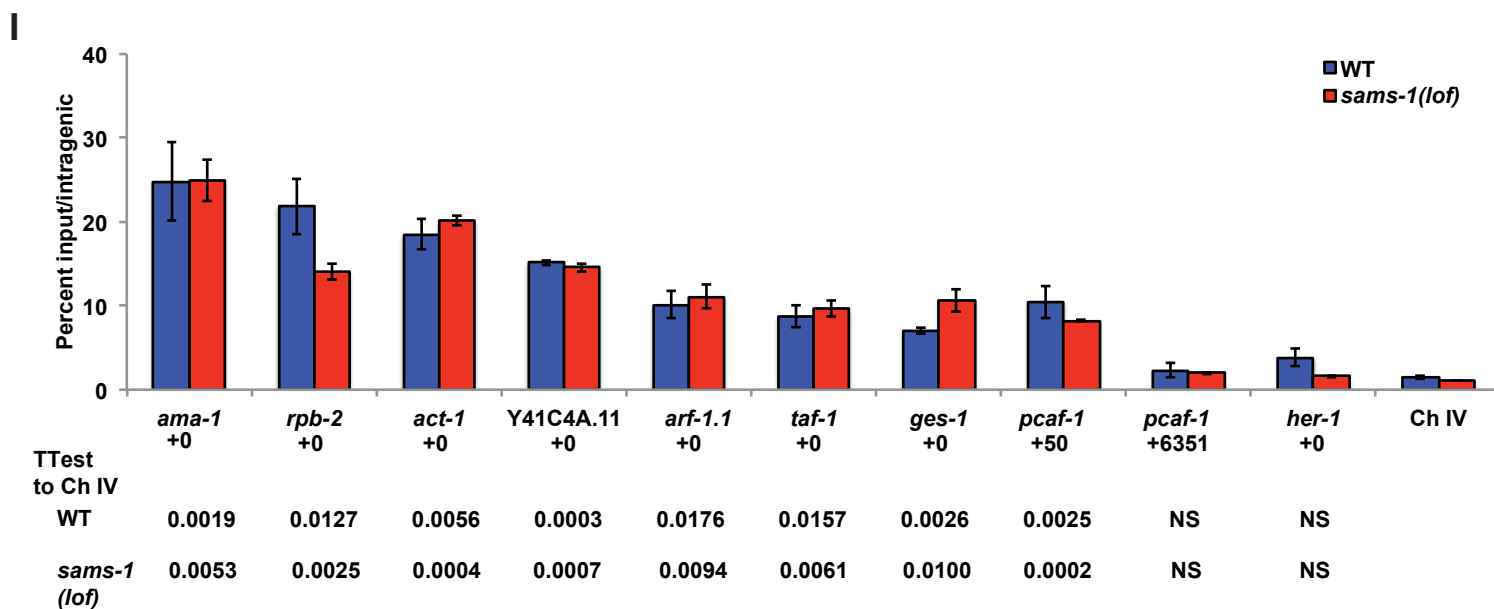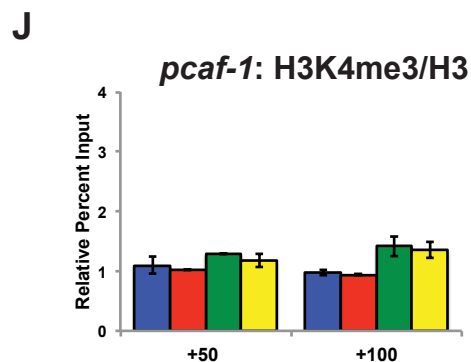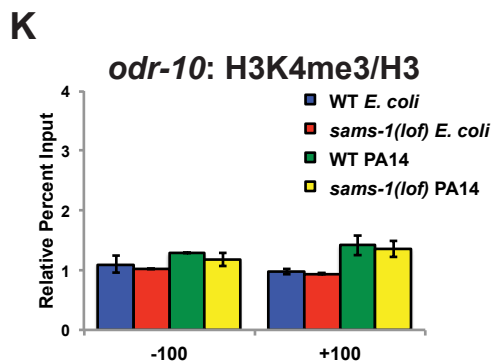

A

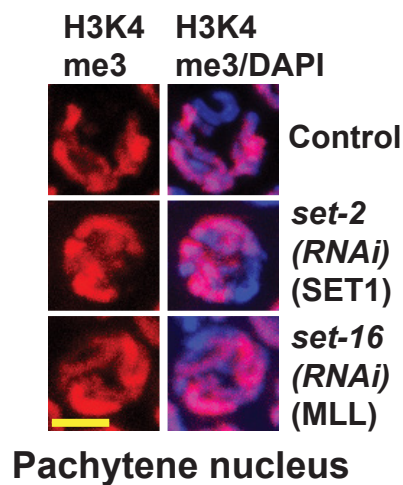

B

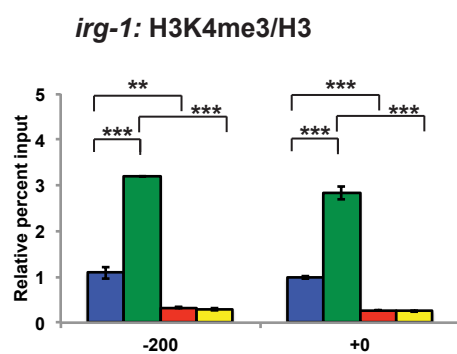

C

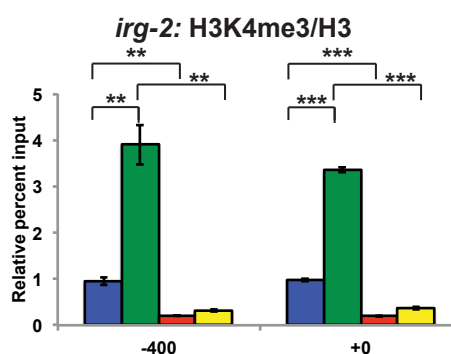

D

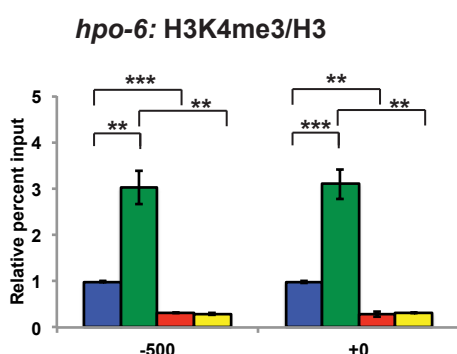

E

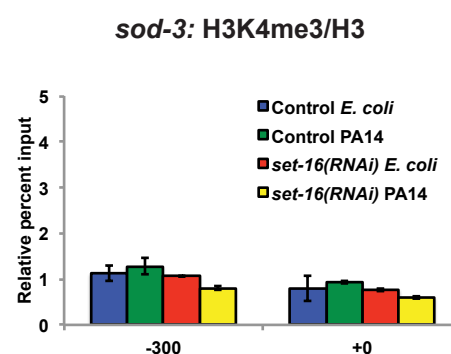

F

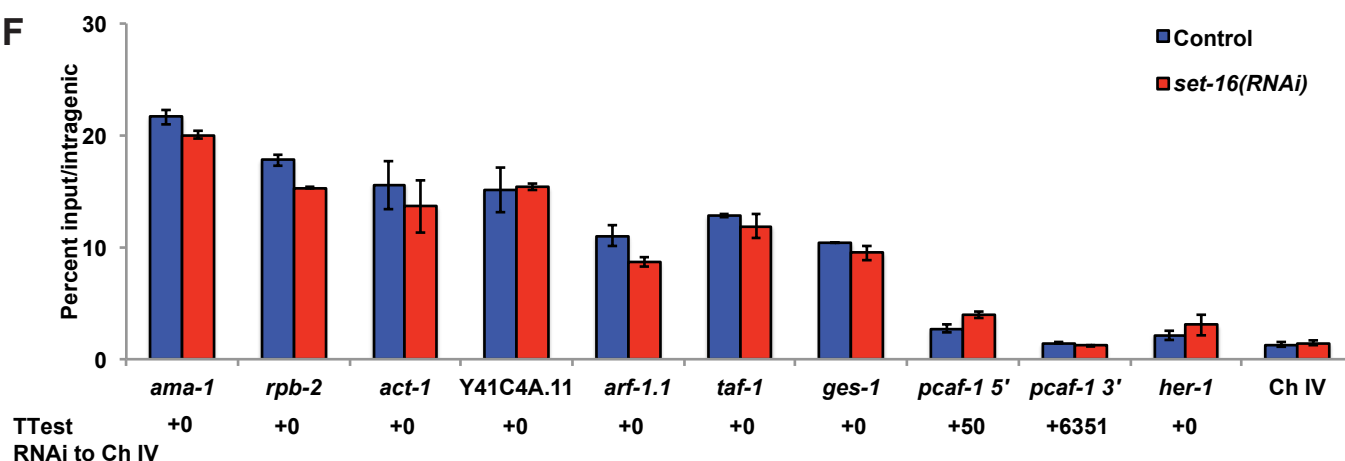

|               |        |        |        |        |        |        |        |        |    |    |
|---------------|--------|--------|--------|--------|--------|--------|--------|--------|----|----|
| Control       | 0.0006 | 0.0006 | 0.0116 | 0.0101 | 0.0047 | 0.0003 | 0.0004 | 0.0488 | NS | NS |
| <i>set-16</i> | 0.0002 | 0.0002 | 0.0180 | 0.0003 | 0.0021 | 0.0057 | 0.0036 | 0.0110 | NS | NS |

## Supplemental Figure Legends

**Figure S1. Choline rescues upregulation of lipogenic or innate immune genes in *sams-1(lof)* animals on *E. coli*.** (A) Indirect ELISA assay (Artus Biosystems) showing SAM levels normalized to protein concentration in control or *sams-1(RNAi)* animals. qRT-PCR showing expression of genes involved in lipogenesis, or an unrelated, highly expressed gene (B) or innate immune genes (C) compared between control and choline treated (CH) groups in wild type and *sams-1(lof)* mutants. D. GC/MS assays comparing major lipid classes in control and *sams-1(RNAi)* with choline treated samples. PE: phosphatidylethanolamine; PS: phosphatidylserine, PI; phosphatidylinositol; CL: cardiolipin; TG: triglyceride. RT-PCR comparing choline rescue of *sams-1(RNAi)* with *pcyt-1(RNAi)* for a lipogenic gene (E), a highly expressed gene (F) or immune function genes (H-J). Legend refers to E-I. Error bars show standard deviation. Results from Student's T test shown by \* <0.05, \*\* <0.01, \*\*\* <0.005.

**Figure S2. *sams-1(lof)* mutants fail to accumulate activating histone methylation marks on infection response genes when exposed to *Pseudomonas*.** H3K4me3 is diminished in nuclei of intestinal cells (A) after *sams-1(RNAi)* and also in choline treated *sams-1(RNAi)*. Yellow bar shows 2 microns. Image is identical to **Figure 6A** with levels increased to visualize staining in *sams-1(RNAi)* nuclei. B. Immunofluorescence showing H3K4me3 staining is specific to the transcriptionally active autosomes in pachytene nuclei of *sams-1(RNAi)* germlines. Quantitation of immunofluorescence showing an average of pixel intensity over area for 8-12 nuclei per sample for Pol II Pser5 (C), Pol II unP (D), Pol II Pser2 (E), H3K36 (F), H3K9ac (G) or H3K9me3 (H). I. Control chromatin immunoprecipitation comparing enrichment of H3K4me3 in control or *sams-1(lof)* animals grown on *E. coli* at the

promoter regions of genes expressed in the intestine and other tissues (*ama-1*, *rpb-2*, *act-1*, *Y41C4A.11*, *arf-1.1*, *taf-1* or *pcaf-1*), an intestinal specific gene (*ges-1*) or a gene that is not expressed in hermaphrodites (*her-1*). Values are relative to an intragenic sequence on chromosome IV. Chromatin immunoprecipitation comparing levels of H3K4me3 around the start site of control genes grown on *E. coli* (OP50) or *Pseudomonas* (PA14) in wild-type (WT) or *sams-1(laf)* mutants for *pcaf-1* (K) and *odr-10* (J). Input levels are normalized to the WT *E. coli* value on the upstream primer pair. Data from **Figure 6 E-J**, **Figure S2 C**, **J-K** are from the same representative chromatin immunoprecipitation, separate qPCRs for *pcaf-1* were used in **Figure S2C** and **S2J** to allow comparison to relative gene sets. Error bars show standard deviation. Results from Student's T test shown by \* <0.05, \*\* <0.01, \*\*\* <0.005.

**Figure S3: *set-16/MLL* is important for expression of infection response genes upon *Pseudomonas* exposure.** **A.** Immunofluorescence showing H3K4me3 staining is specific to the transcriptionally active autosomes in pachytene nuclei after RNAi of *set-2* or *set-16* from hatching to young adulthood. **B.** Control chromatin immunoprecipitation comparing enrichment of H3K4me3 in control or *set-16* animals grown on *E. coli* at the promoter regions of genes expressed in the intestine and other tissues (*ama-1*, *rpb-2*, *act-1*, *Y41C4A.11*, *arf-1.1*, *taf-1* or *pcaf-1*), an intestinal specific gene (*ges-1*) or a gene that is not expressed in hermaphrodites (*her-1*). Values are relative to an intragenic sequence on Chromosome IV. Representative chromatin immunoprecipitations comparing induction of infection response genes (**C-E**) and a control gene (**F**) in response to PA14 after control or *set-16* RNAi. Error bars show standard deviation. Results from Student's T test shown by \* <0.05, \*\* <0.01, \*\*\* <0.005.

## Supplemental Experimental Procedure

**SAM measurements:** 1 gram of young adult *C. elegans* were frozen liquid nitrogen, then ground to a fine powder in a -80 degree mortar. After solubilization in 2 milliliters of phospho-buffered saline, extracts were sheared in a Dounce homogenizer with pestle B before sonication for 2-5 20 second bursts. Lysates were cleared, then 30 microliters was used a SAM measurement ELISA kit (Artus Bioscience).
